# Supplementary material for: Structural basis for a complex I mutation that blocks pathological ROS production
Source: PubMed Central journal article supplement (PMC7846746; doi:10.1038/s41467-021-20942-w), 2021-01-29
Supplement: 41467_2021_20942_MOESM2_ESM.pdf [file 41467_2021_20942_MOESM2_ESM.pdf]

## **Description of Additional Supplementary Files**

**Supplementary Movie 1:** This movie shows the effects of the ND6-P25L mutation on the conformational changes of subunit ND6 during the A/D transition of complex I.
